# Supplementary material
Source: PubMed Central journal article supplement (PMC4178688)
Supplement: AEM.01767-14_zam999105696so1.pdf [file AEM.01767-14_zam999105696so1.pdf]

## Supplemental Material

### **Functional and phylogenetic divergence of fungal adenylate-forming reductases**

Daniel Kalb, Gerald Lackner, Dirk Hoffmeister<sup>#</sup>

Friedrich-Schiller-Universität Jena, Department Pharmaceutical Microbiology at the Hans-Knöll-Institute, Beutenbergstrasse 11a, 07745 Jena, Germany

<sup>#</sup>Corresponding author. E-mail address: [dirk.hoffmeister@hki-jena.de](mailto:dirk.hoffmeister@hki-jena.de)

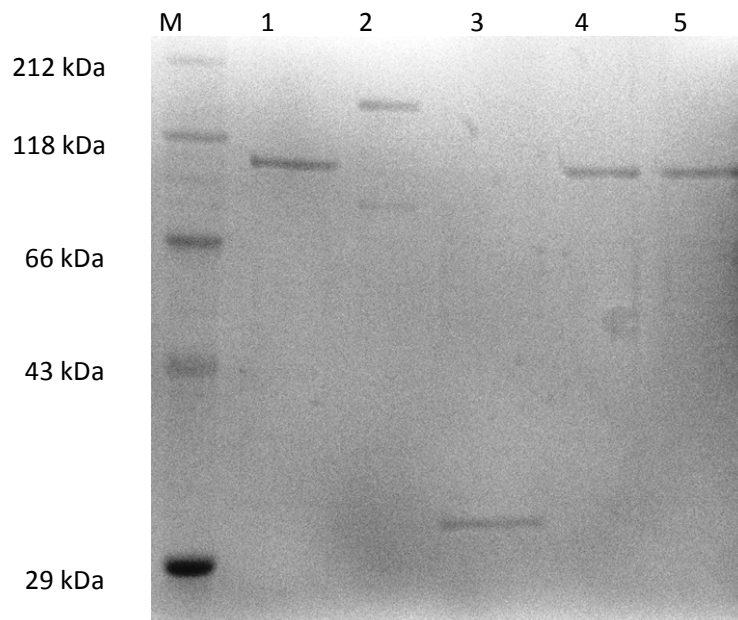

**Figure S1.** SDS-Polyacrylamide gel electrophoresis of purified enzymes Nps1 (lane 1), Nps3 (lane 2), phosphopantetheinyltransferase Svp (lane 3) LnaA (lane 4), and LnbA (lane 5). Left lane: molecular weight standard (M).

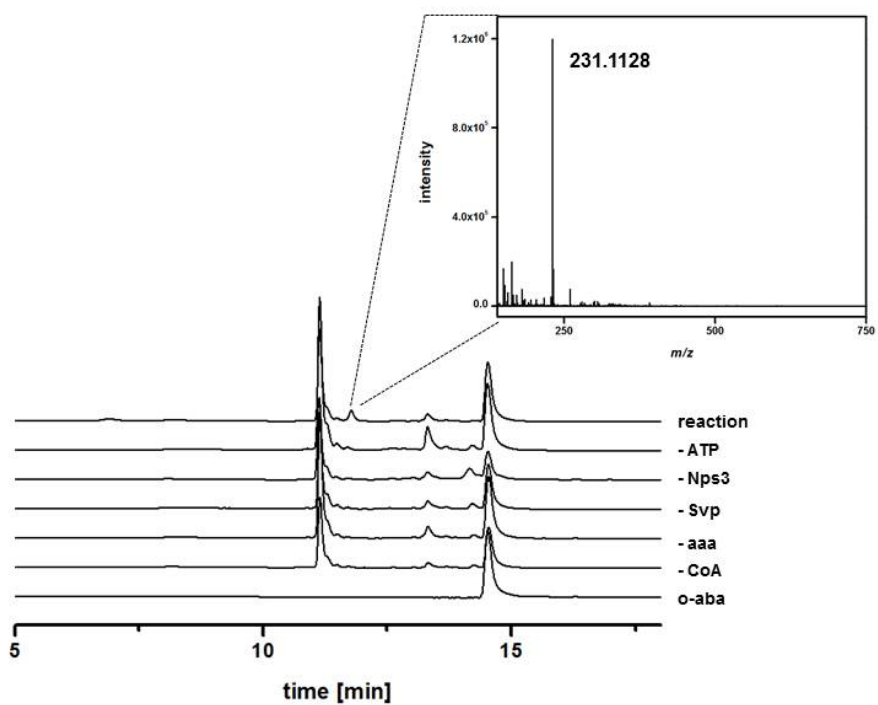

**Figure S2.** LC/MS-analysis of Nps3-catalyzed L- $\alpha$ -aminoadipate-6-semialdehyde formation. This product stands in chemical equilibrium with  $\Delta^1$ -piperidine-6-carboxylic acid. *O*-aminobenzaldehyde reacts with the latter to give the dihydroquinazolinium cation ( $m/z$  231.1128 [M]<sup>+</sup>), which is not present in the controls without enzyme or substrates. The signal at  $t_R = 11.3$  min is unknown.

**Table S1.** Sequences used for the phylogenetic analyses of fungal adenylate-forming reductases.

| <b>Name</b>                      | <b>Accession</b> | <b>Organism</b>                                              | <b>Length (aa)</b> |
|----------------------------------|------------------|--------------------------------------------------------------|--------------------|
| <i>A. bisporus</i> XP_006462975  | XP_006462975     | <i>Agaricus bisporus</i> var. <i>bisporus</i> H97            | 1092               |
| <i>A. clavatus</i> XP_001275157  | XP_001275157     | <i>Aspergillus clavatus</i> NRRL 1                           | 996                |
| <i>A. flavus</i> LnaA            | XP_002384042.1   | <i>Aspergillus flavus</i> NRRL3357                           | 1042               |
| <i>A. flavus</i> LnbA            | XP_002384859.1   | <i>Aspergillus flavus</i> NRRL3357                           | 1029               |
| <i>A. fumigatus</i> XP_001481395 | XP_001481395     | <i>Aspergillus fumigatus</i> Af293                           | 994                |
| <i>A. nidulans</i> XP_664048     | XP_664048        | <i>Aspergillus nidulans</i> FGSC A4                          | 1039               |
| <i>A. terreus</i> ATEG_03630     | XP_001212808     | <i>Aspergillus terreus</i> NIH2624                           | 1069               |
| <i>Brevibacillus brevis</i> PheA | 1AMU             | <i>Brevibacillus brevis</i>                                  | 548                |
| <i>C. albicans</i> Lys2          | Q12572           | <i>Candida albicans</i>                                      | 1391               |
| <i>C. cinerea</i> NPS3           | XP_001836648.2   | <i>Coprinopsis cinerea</i> okayama                           | 1049               |
| <i>C. subvermispota</i> NPS1     | EMD40260.1       | <i>Ceriporiopsis subvermispota</i> B                         | 1049               |
| <i>C. subvermispota</i> NPS3     | EMD34789.1       | <i>Ceriporiopsis subvermispota</i> B                         | 1417               |
| <i>D. squalens</i> Lys2          | EJF63849.1       | <i>Dichomitus squalens</i> LYAD-421 SS1                      | 1428               |
| <i>D. squalens</i> NPS1          | EJF63449.1       | <i>Dichomitus squalens</i> LYAD-421 SS1                      | 1033               |
| <i>F. mediterranea</i> NPS1      | EJC98159.1       | <i>Fomitiporia mediterranea</i> MF3/22                       | 1045               |
| <i>F. oxysporum</i> EXM16769     | EXM16769         | <i>Fusarium oxysporum</i> f. sp. <i>vasinfectum</i><br>25433 | 992                |
| <i>F. pinicola</i> Lys2          | EPS97414         | <i>Fomitopsis pinicola</i> FP-58527 SS1                      | 1211               |
| <i>G. trabeum</i> EPQ54396       | EPQ54396         | <i>Gloeophyllum trabeum</i> ATCC 11539                       | 1059               |
| <i>H. annosum</i> Lys2           | ETW75842         | <i>Heterobasidion irregulare</i> TC 32-1                     | 1419               |
| <i>M. roreri</i> ESK96610        | ESK96610         | <i>Moniliophthora roreri</i> MCA 2997                        | 1086               |

|                               |                   |                                                    |      |
|-------------------------------|-------------------|----------------------------------------------------|------|
| <i>M. roleri</i> ESK96610     | ESK96610          | <i>Moniliophthora roleri</i> MCA 2997              | 1086 |
| <i>P. brevispora</i> Lys2     | ProteinID 161728  | <i>Phlebia brevispora</i> HHB-7030 SS6             | 1428 |
| <i>P. brevispora</i> NPS1     | ProteinID 137634  | <i>Phlebia brevispora</i> HHB-7030 SS6             | 1022 |
| <i>P. carnosa</i> NPSX        | EKM49537.1        | <i>Phanerochaete carnosa</i> HHB-10118-sp          | 1024 |
| <i>P. ostreatus</i> NPS1      | ProteinID 1062196 | <i>Pleurotus ostreatus</i> PC15                    | 915  |
| <i>P. strigosozonata</i> NPS2 | EIN08908          | <i>Punctularia strigosozonata</i> HHB-11173<br>SS5 | 1443 |
| <i>S. cerevisiae</i> Lys2     | NP_009673.1       | <i>Saccharomyces cerevisiae</i> S288c              | 1392 |
| <i>S. hirsutum</i> EIM84978   | EIM84978          | <i>Stereum hirsutum</i> FP-91666 SS1               | 1086 |
| <i>S. hirsutum</i> Lys2       | EIM82061.1        | <i>Stereum hirsutum</i> FP-91666 SS1               | 1425 |
| <i>S. hirsutum</i> NPS3       | EIM85977.1        | <i>Stereum hirsutum</i> FP-91666 SS1               | 1048 |
| <i>T. reesei</i> XP_006964071 | XP_006964071      | <i>Trichoderma reesei</i> QM6a                     | 1052 |
| <i>T. versicolor</i> NPS4     | EIW55513.1        | <i>Trametes versicolor</i> FP-101664 SS1           | 1419 |
| <i>T. versicolor</i> NPS7     | EIW59229.1        | <i>Trametes versicolor</i> FP-101664 SS1           | 1035 |
| <i>T. virens</i> EHK20896     | EHK20896          | <i>Trichoderma virens</i> Gv29-8                   | 969  |
| <i>T. virens</i> EHK23193     | EHK23193          | <i>Trichoderma virens</i> Gv29-8                   | 1049 |
